# Supplementary material for: Endovascular vs. Open Repair of Abdominal Aortic Aneurysms in the Medicare Population
Source: Atypon-hosted journal article supplement (doi:10.1056/nejmoa0707348), 2008-01-30
Supplement: nejm_schermerhorn_464sa1.pdf [file nejm_schermerhorn_464sa1.pdf]

## Supplementary Appendix

This appendix has been provided by the authors to give readers additional information about their work.

Supplement to: Schermerhorn ML, O'Malley AJ, Jhaveri A, Cotterill P, Pomposelli F, Landon BE. Endovascular vs. open repair of abdominal aortic aneurysms in the Medicare population. *N Engl J Med* 2008;358:464-74.

Appendix. Baseline demographics and comorbid conditions of Medicare beneficiaries undergoing endovascular and open aortic aneurysm repair 2001-2004.

|                                             | Unmatched Cohorts |       |       |       |       |       |       |       | Matched Cohorts |       |       |       |       |       |       |       |
|---------------------------------------------|-------------------|-------|-------|-------|-------|-------|-------|-------|-----------------|-------|-------|-------|-------|-------|-------|-------|
|                                             | 2001              |       | 2002  |       | 2003  |       | 2004  |       | 2001            |       | 2002  |       | 2003  |       | 2004  |       |
|                                             | Endo              | Open  | Endo  | Open  | Endo  | Open  | Endo  | Open  | Endo            | Open  | Endo  | Open  | Endo  | Open  | Endo  | Open  |
| <b>Sample size</b>                          | 5611              | 9826  | 6893  | 8127  | 7619  | 7262  | 9419  | 6841  | 5200            | 5200  | 5744  | 5744  | 5780  | 5780  | 6106  | 6106  |
| <b>Gender (Percent Male)</b>                | 84.6%             | 75.6% | 83.7% | 74.6% | 82.6% | 74.1% | 82.6% | 73.5% | 83.6%           | 83.8% | 81.5% | 81.8% | 79.3% | 79.4% | 77.3% | 77.9% |
| <b>Age</b>                                  |                   |       |       |       |       |       |       |       |                 |       |       |       |       |       |       |       |
| 65-69                                       | 11.0%             | 15.0% | 12.2% | 15.4% | 11.7% | 15.8% | 12.4% | 16.6% | 11.8%           | 11.9% | 13.7% | 13.7% | 14.2% | 14.1% | 15.4% | 15.5% |
| 70-74                                       | 27.6%             | 32.6% | 27.2% | 32.4% | 26.6% | 31.6% | 26.2% | 31.0% | 29.1%           | 28.6% | 29.9% | 29.7% | 29.9% | 30.2% | 29.7% | 30.0% |
| 75-79                                       | 36.3%             | 35.2% | 35.8% | 35.8% | 35.7% | 35.4% | 35.1% | 34.9% | 37.2%           | 37.5% | 36.6% | 36.9% | 35.9% | 36.0% | 36.1% | 35.9% |
| 80-84                                       | 15.4%             | 12.2% | 15.7% | 11.5% | 16.1% | 12.6% | 15.9% | 12.5% | 14.7%           | 15.0% | 13.6% | 13.7% | 14.3% | 14.1% | 13.0% | 13.3% |
| >=85                                        | 9.7%              | 5.0%  | 9.0%  | 4.9%  | 9.8%  | 4.6%  | 10.4% | 4.9%  | 7.2%            | 7.0%  | 6.2%  | 6.0%  | 5.7%  | 5.6%  | 5.9%  | 5.4%  |
| <b>Race</b>                                 |                   |       |       |       |       |       |       |       |                 |       |       |       |       |       |       |       |
| White                                       | 96.5%             | 95.9% | 95.6% | 95.5% | 95.6% | 95.2% | 95.6% | 95.5% | 96.5%           | 96.7% | 95.8% | 95.7% | 95.4% | 95.6% | 95.6% | 95.7% |
| Black                                       | 2.0%              | 2.7%  | 2.8%  | 3.0%  | 2.8%  | 2.6%  | 2.8%  | 2.9%  | 2.1%            | 2.0%  | 2.8%  | 2.8%  | 2.8%  | 2.5%  | 2.9%  | 2.7%  |
| Hispanic                                    | 0.3%              | 0.5%  | 0.6%  | 0.4%  | 0.5%  | 0.7%  | 0.6%  | 0.5%  | 0.4%            | 0.4%  | 0.4%  | 0.5%  | 0.6%  | 0.7%  | 0.4%  | 0.6%  |
| Other                                       | 1.1%              | 0.9%  | 1.0%  | 1.1%  | 1.1%  | 1.4%  | 1.1%  | 1.1%  | 1.1%            | 1.0%  | 1.0%  | 1.0%  | 1.1%  | 1.2%  | 1.1%  | 1.1%  |
| <b>Dually Eligible</b>                      | 1.0%              | 0.9%  | 0.8%  | 0.8%  | 0.8%  | 1.1%  | 0.8%  | 1.0%  | 0.9%            | 0.9%  | 0.7%  | 0.8%  | 0.9%  | 0.9%  | 0.9%  | 0.8%  |
| <b>Urgent Admission</b>                     | 1.7%              | 6.7%  | 2.5%  | 6.7%  | 2.7%  | 6.1%  | 2.8%  | 6.5%  | 1.9%            | 1.8%  | 2.9%  | 3.1%  | 3.3%  | 2.9%  | 4.0%  | 3.8%  |
| <b>Comorbid Conditions</b>                  |                   |       |       |       |       |       |       |       |                 |       |       |       |       |       |       |       |
| Prior Myocardial Infarction within 6 months | 2.2%              | 2.0%  | 1.8%  | 1.9%  | 1.9%  | 1.7%  | 1.7%  | 1.6%  | 2.1%            | 1.8%  | 1.9%  | 2.0%  | 1.7%  | 1.8%  | 1.8%  | 1.6%  |
| Myocardial Infarction within 6-24 months    | 10.0%             | 7.2%  | 9.4%  | 7.2%  | 8.9%  | 6.9%  | 8.4%  | 7.0%  | 9.2%            | 8.8%  | 7.9%  | 8.1%  | 7.7%  | 7.6%  | 7.3%  | 7.4%  |
| Valvular Heart Disease                      | 12.4%             | 9.5%  | 11.5% | 9.2%  | 12.5% | 9.7%  | 12.4% | 10.0% | 11.7%           | 10.9% | 10.3% | 10.1% | 11.1% | 10.7% | 10.7% | 10.2% |
| Congestive Heart Failure                    | 17.0%             | 12.4% | 16.1% | 11.5% | 16.3% | 11.0% | 15.5% | 11.2% | 15.6%           | 14.8% | 13.4% | 13.5% | 12.7% | 12.7% | 11.8% | 11.7% |
| Peripheral Vascular Disease                 | 21.0%             | 20.4% | 20.6% | 21.4% | 21.5% | 21.7% | 21.6% | 22.7% | 20.8%           | 20.0% | 20.4% | 20.4% | 21.8% | 20.9% | 22.1% | 21.8% |
| Cerebrovascular Disease                     | 16.1%             | 16.2% | 16.3% | 17.0% | 15.8% | 17.3% | 16.0% | 16.8% | 16.2%           | 15.9% | 16.5% | 16.3% | 16.5% | 16.7% | 16.3% | 16.4% |
| Hypertension                                | 63.9%             | 61.4% | 64.4% | 64.5% | 67.4% | 67.1% | 70.6% | 68.5% | 63.6%           | 63.3% | 64.1% | 63.5% | 67.4% | 67.3% | 69.2% | 68.6% |
| Diabetes Mellitus                           | 16.5%             | 14.0% | 16.7% | 14.3% | 18.0% | 14.1% | 19.3% | 15.0% | 15.6%           | 15.8% | 15.6% | 15.6% | 15.6% | 15.7% | 16.0% | 15.8% |
| Chronic Obstructive Pulmonary Disease       | 30.7%             | 28.2% | 30.5% | 28.6% | 30.8% | 29.2% | 31.1% | 29.8% | 30.0%           | 29.8% | 29.7% | 29.2% | 29.9% | 29.8% | 29.2% | 30.0% |
| Renal Disease                               | 4.4%              | 3.2%  | 4.8%  | 4.2%  | 5.4%  | 4.4%  | 5.3%  | 4.8%  | 4.0%            | 3.8%  | 4.4%  | 4.3%  | 5.0%  | 4.7%  | 4.9%  | 4.7%  |
| End Stage Renal Disease                     | 0.6%              | 0.2%  | 0.6%  | 0.2%  | 0.6%  | 0.3%  | 0.6%  | 0.3%  | 0.3%            | 0.3%  | 0.3%  | 0.3%  | 0.3%  | 0.4%  | 0.3%  | 0.4%  |
| Cancer                                      | 24.0%             | 18.4% | 23.6% | 17.9% | 24.2% | 18.3% | 23.1% | 18.0% | 22.6%           | 23.4% | 20.6% | 20.9% | 20.7% | 20.5% | 19.3% | 19.2% |
| Obesity                                     | 2.2%              | 1.7%  | 2.3%  | 1.5%  | 2.4%  | 1.6%  | 2.7%  | 1.8%  | 2.0%            | 2.1%  | 1.9%  | 1.9%  | 2.0%  | 1.9%  | 2.0%  | 1.9%  |
| Prior AAA diagnosis w/o rupture             | 80.1%             | 61.0% | 76.2% | 60.8% | 75.7% | 62.6% | 74.5% | 62.8% | 78.6%           | 78.3% | 72.2% | 71.5% | 70.4% | 70.3% | 67.0% | 66.7% |
